# Supplementary material
Source: PubMed Central journal article supplement (PMC3415253)
Supplement: NIHMS322577-supplement-supplement_1.pdf [file NIHMS322577-supplement-supplement_1.pdf]

## SUPPLEMENTAL MATERIAL

**Supplemental Table 1.** Univariate Predictors of Exercise Oscillatory Ventilation

| Variable                        | Beta-Coefficient | P-Value |
|---------------------------------|------------------|---------|
| Age                             | -0.04            | 0.105   |
| Sex                             | 0.04             | 0.952   |
| Ischemic                        | -0.64            | 0.245   |
| Weight                          | 0.01             | 0.475   |
| LVEF                            | -0.052           | 0.264   |
| RVEF                            | -0.078           | 0.014   |
| Beta Blocker                    | -0.11            | 0.680   |
| ACE Inhibitor                   | 0.693            | 0.245   |
| Diuretic                        | 1.75             | 0.117   |
| ARB                             | 1.01             | 0.078   |
| Digoxin                         | 0.435            | 0.421   |
| CRT                             | 0.482            | 0.448   |
| RER                             | 1.63             | 0.372   |
| Ventilatory Efficiency          | 0.048            | 0.088   |
| Peak VO <sub>2</sub>            | -0.169           | 0.045   |
| Heart Rate (Rest)               | 0.012            | 0.531   |
| RAP (Rest)                      | 0.158            | 0.053   |
| PAP (Rest)                      | 0.097            | 0.010   |
| PCWP (Rest)                     | 0.127            | 0.004   |
| SBP (Rest)                      | -0.016           | 0.170   |
| DBP (Rest)                      | 0.018            | 0.444   |
| MAP (Rest)                      | -0.008           | 0.684   |
| C(a-v)O <sub>2</sub> (Rest)     | 0.637            | 0.005   |
| Cardiac Index (Rest)            | -2.20            | 0.007   |
| PaO <sub>2</sub> (Rest)         | 0.015            | 0.488   |
| PaCO <sub>2</sub> (Rest)        | 0.022            | 0.669   |
| pH (Rest)                       | 10.96            | 0.171   |
| RAP (exercise)                  | 0.02             | 0.029   |
| PAP (exercise)                  | 0.009            | 0.053   |
| PCWP (exercise)                 | 0.014            | 0.027   |
| SBP (exercise)                  | -0.005           | 0.020   |
| DBP (exercise)                  | -0.0004          | 0.910   |
| MAP (exercise)                  | 0.005            | 0.132   |
| C(a-v)O <sub>2</sub> (exercise) | 0.077            | 0.006   |
| Cardiac Index (exercise)        | -0.33            | 0.001   |
| PaO <sub>2</sub> (exercise)     | 0.006            | 0.066   |
| PaCO <sub>2</sub> (exercise)    | -0.006           | 0.460   |
| pH (exercise)                   | -2.85            | 0.029   |

MAP indicates mean systemic arterial pressure; RAP indicates mean right atrial pressure; PAP indicates mean pulmonary arterial pressure; C(a-v)O<sub>2</sub> indicates arterio-venous difference in oxygen content (i.e. oxygen extraction).

## **Supplemental Figure Legends**

**Supplemental Figure 1.** Receiver operator characteristic analysis of the relationship between the presence of exercise oscillatory ventilation and cardiac index at rest (blue line) and during exercise (red line).

**Supplemental Figure 2.** Graphical depiction of resolution of exercise oscillatory ventilation during late exercise in a representative patient.

Supplemental Figure 1

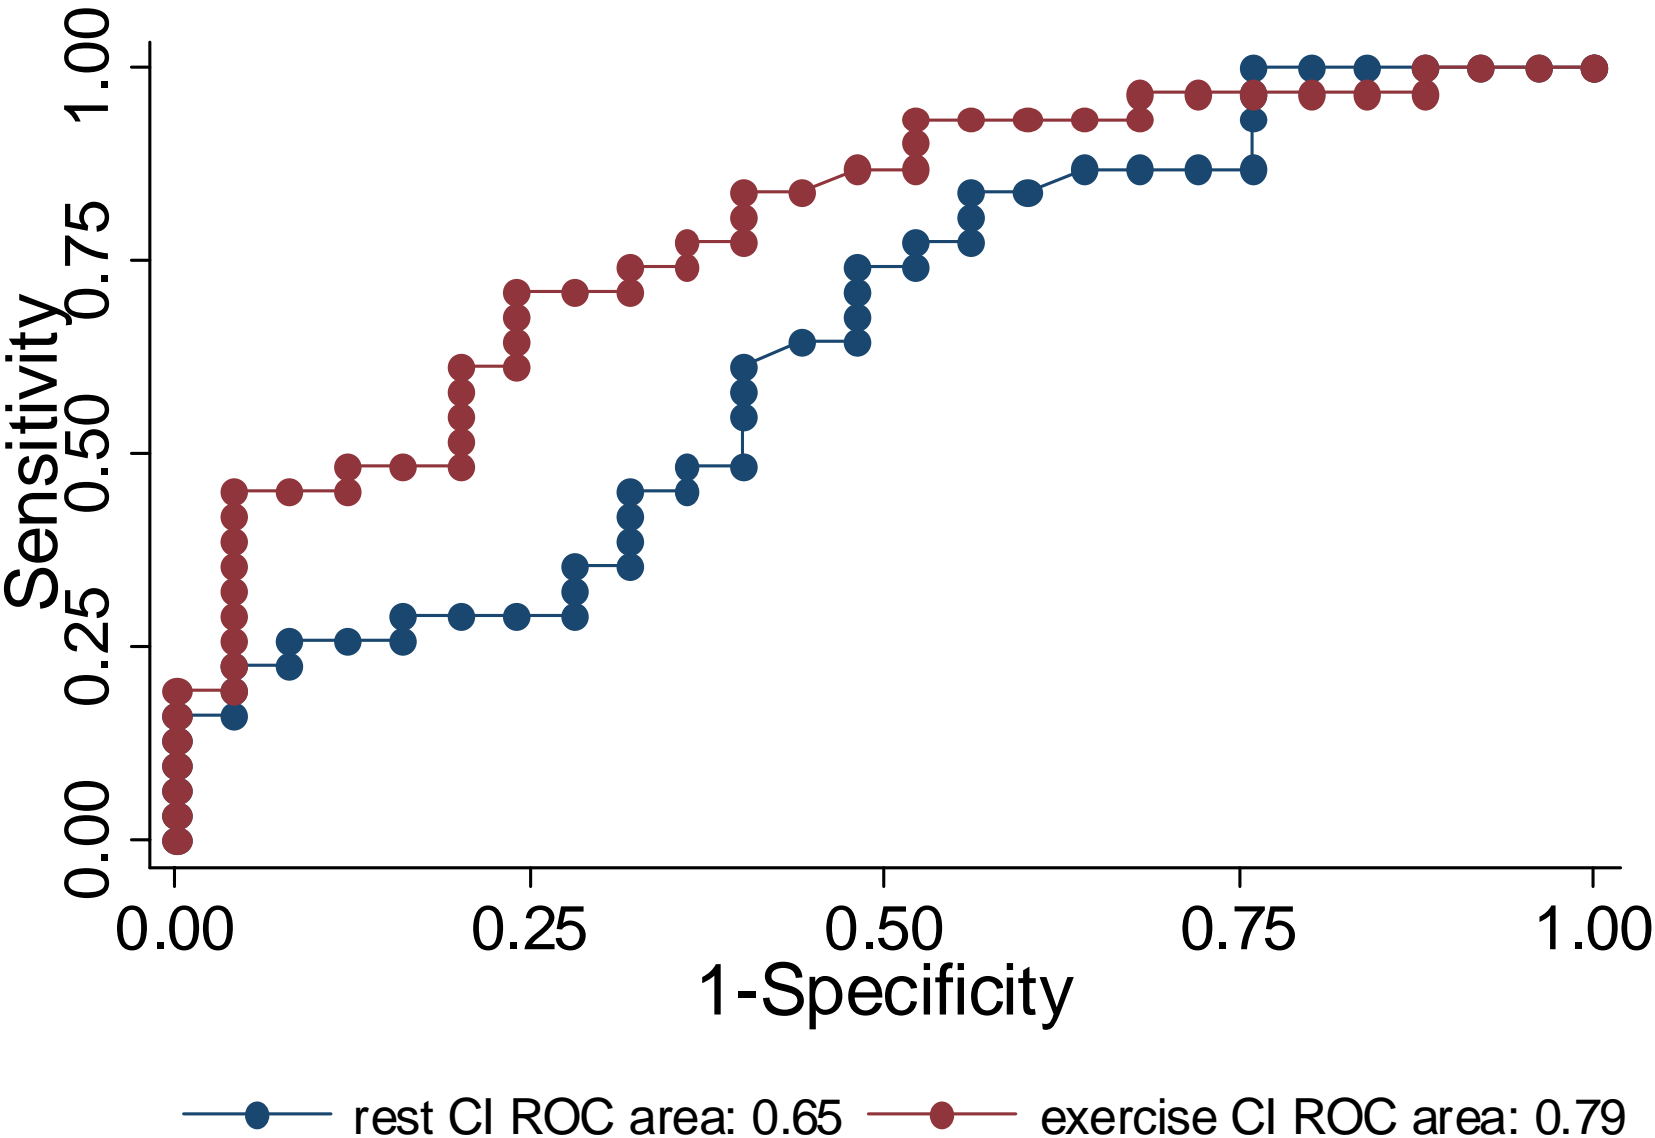

Supplemental Figure 2

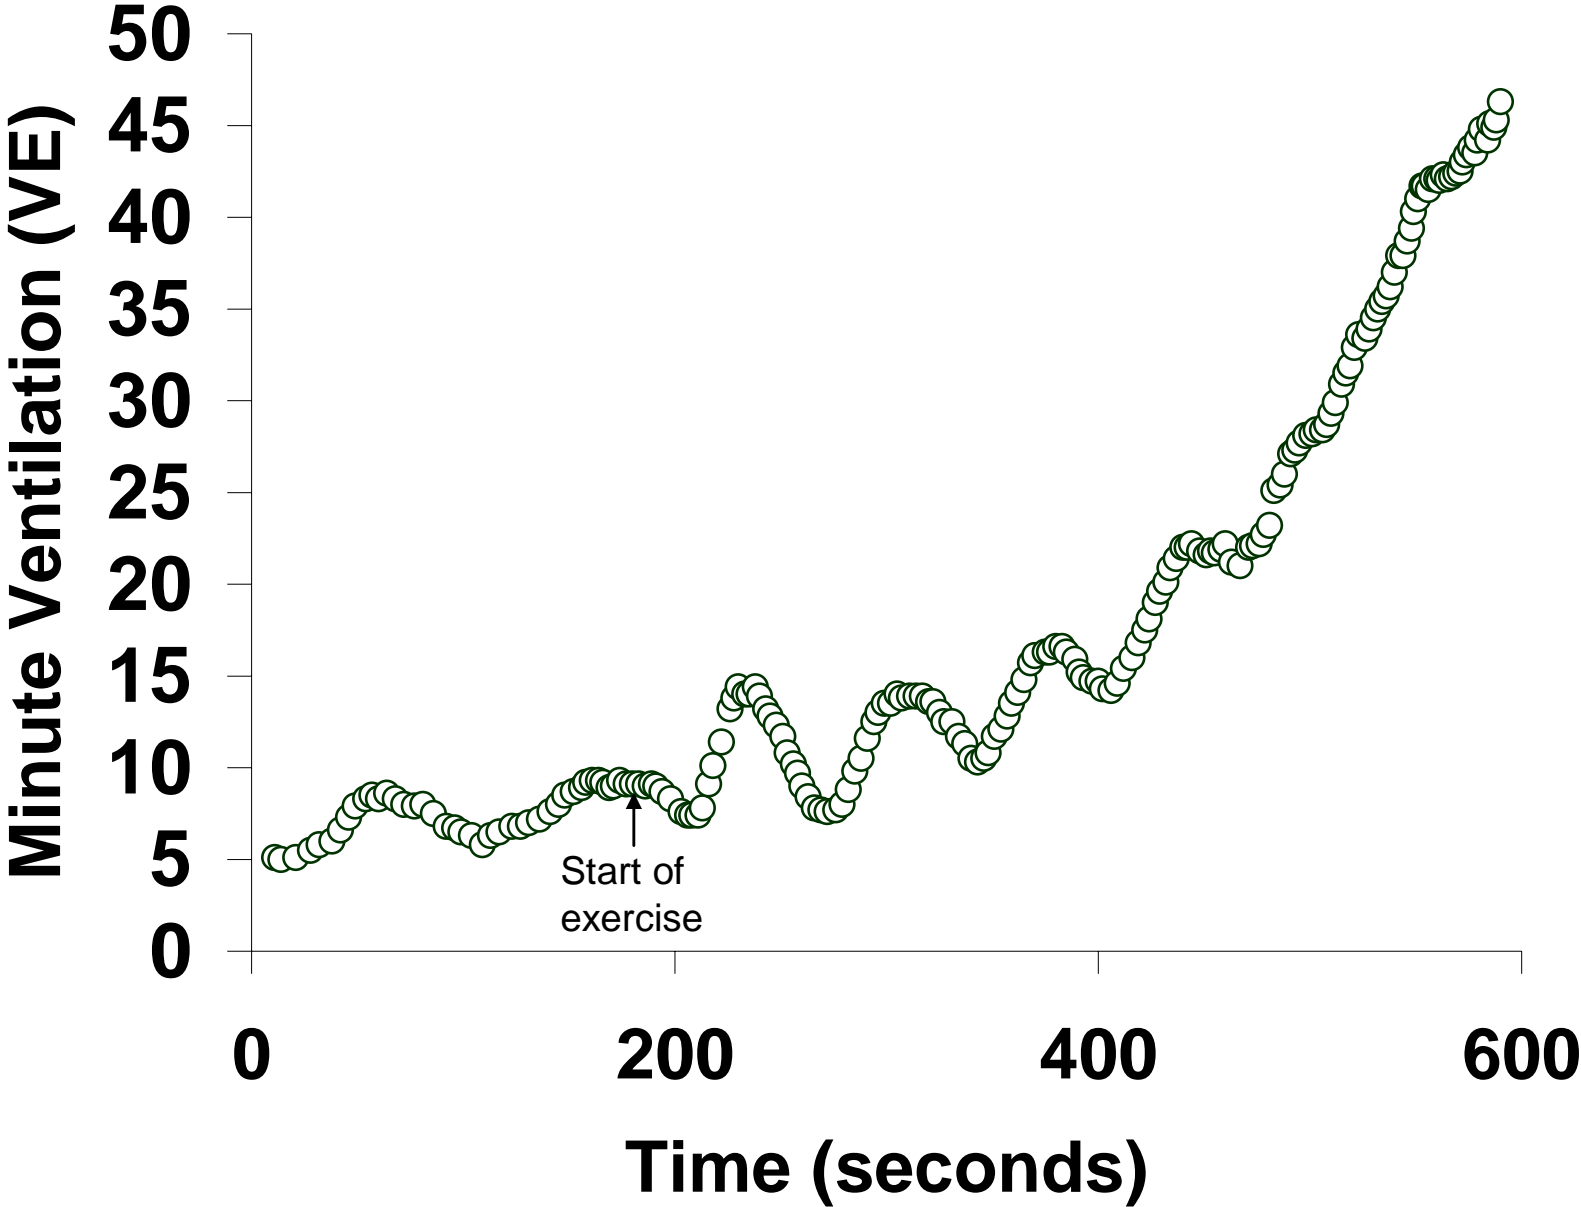

Cyclic fluctuations in minute ventilation during exercise, termed exercise oscillatory ventilation (EOV), have been observed in 19-51% of patients with systolic heart failure. When present, EOV potently predicts adverse outcomes in heart failure patients. However, mechanistic insights into EOV have been limited by the absence of studies relating EOV to invasive hemodynamic measurements and blood gases performed during exercise. EOV was present in 45% of HF subjects in this study and was closely related to elevated filling cardiac filling pressures and reduced cardiac index during exercise but not to PaCO<sub>2</sub> or PaO<sub>2</sub>. Multivariate logistic regression identified that low exercise cardiac index is the strongest predictor of EOV (odds ratio 1.39, for each 1.0 L/min/m<sup>2</sup> decrement in exercise CI, 95% confidence interval 1.14-1.70, P=0.001).

Among HF patients with EOV, exercise CI was also inversely related to the cycle length (R=-0.71) and amplitude (R=-0.60) of oscillations (both P<0.001). EOV cycle length and amplitude decreased proportionate to increases in cardiac index in 11 heart failure patients with EOV who were treated with 12 weeks of sildenafil. Because EOV is an easily recognized, reproducible, non-invasive measurement that can be measured during submaximal exercise testing, it represents an attractive surrogate for exercise hemodynamic measurements, which are invasive and challenging to perform. By indicating an inadequate hemodynamic response to exercise (i.e. impaired cardiac index augmentation, increased filling pressures) independent of left ventricular ejection fraction, EOV may provide not only prognostic information but also an impetus to intensify therapy to optimize cardiac hemodynamics in HF subjects.
